# Supplementary material
Source: PubMed Central journal article supplement (PMC2864291)
Supplement: djq093_1.pdf [file djq093_1.pdf]

**Supplementary Table 1.** Primer sequences used for real-time reverse transcriptase polymerase chain reaction

| Gene          | Forward primer (5' → 3') | Reverse primer (5' → 3') |
|---------------|--------------------------|--------------------------|
| <i>ABCC1</i>  | GAGGAGGTGGAGGCTTTGATC    | AAGTAGGGCCCAAAGGTCTTG    |
| <i>ABCC2</i>  | GTGGCTGTTGAGCGAATAACTG   | GCCTTTGCTGGGCCAAT        |
| <i>ABCG2</i>  | CGGGTGACTCATCCCAACAT     | CTTAACCAAAGGCTCAGGATCTCA |
| <i>BCL2</i>   | CATGTGTGTGGAGAGCGTCAA    | GCCGGTTCAGGTACTIONCAGTCA |
| <i>BCL2L1</i> | GGCTGGGATACTTTTGTGGA     | AAGAGTGAGCCCAGCAGAAC     |
| <i>BAX</i>    | CCGCCGTGGACACAGACT       | TTGAAGTTGCCGTCAGAAAACA   |
| <i>GSTP1</i>  | AGAGCTGGAAGGAGGAGGTG     | AGGTCTCCGTCCCTGGAACCT    |
| <i>HIF1A</i>  | CCCCAGATTCAGGATCAGACAGCC | TGGGACTATTAGGCTCAGGTGAAC |
| <i>HMOX1</i>  | TGGAAGACACCCTAATGTG      | GGCCGTGTCAACAAGGATACTT   |
| <i>MT1A</i>   | CTCGAAATGGACCCCAACTGGTGT | CAGCCCTGGGCACACTTG       |
| <i>MT2A</i>   | GCCCAAGGCTGCAT           | TTGTGGAAGTCGCGTTCTTTAC   |
| <i>NOTCH1</i> | CGGGTCCACCAGTTTGAATG     | GTTGTATTGGTTCGGCACCAT    |
| <i>NFE2L2</i> | AACCACTGGATCTGCCAACTACTC | CTGCGCCAAAAGCTGCAT       |
| <i>POU5F1</i> | CCCCATTTACCACACTCTACTC   | CCAGAGCAGTGACAGGAACAGA   |
| <i>PRODH</i>  | GCCATTAAGCTCACAGCACTGGG  | CTGATGGCCGGCTGGAAGTAG    |
| <i>PROM1</i>  | AGCGATCAAGGAGACCAAAGAG   | GCTAGTTTTTACGCTGGTCAGA   |
| <i>SOD1</i>   | TGGGCCAAAGGATGAAGAGA     | CACATCGGCCACACCATC       |
| <i>SHH</i>    | GGAGCGGACAGGCTGATG       | ACTCCTGGCCACTGGTTCAT     |
